# Supplementary material for: Evaluation of a Combinatorial Immunotherapy Regimen That Can Cure Mice Bearing MYCN-Driven High-Risk Neuroblastoma That Resists Current Clinical Therapy
Source: MDPI journal article supplement (doi:10.3390/jcm13092561), 2024-04-26
Supplement: s1 [file s1]

**Supplementary Table S1:** Statistical output of comparisons of tumor growth for each treatment group represented in Figure 1

| Treatment            | PBS  | TEM+IRI | IC   | TEM+IRI + IC | 12 Gy | TEM+IRI + 12 Gy |
|----------------------|------|---------|------|--------------|-------|-----------------|
| TEM+IRI              | **** |         |      |              |       |                 |
| IC                   | ***  | ns      |      |              |       |                 |
| TEM+IRI + IC         | **** | ns      | *    |              |       |                 |
| 12 Gy                | **** | ***     | **** | *            |       |                 |
| TEM+IRI + 12 Gy      | **** | **      | **** | ns           | ns    |                 |
| TEM+IRI + IC + 12 Gy | **** | ****    | **** | **           | ns    | ns              |

ns = not significant; \*p<0.05; \*\*p<0.01; \*\*\*p<0.001; \*\*\*\*p<0.0001

**Supplementary Table S2:** Statistical output of comparisons of tumor growth for each treatment group represented in Figures 2 and 3. p values <0.05 are highlighted.

[illegible]

**Supplementary Table S3:** Statistical output of comparisons of response rate for each treatment group represented in Figures 2 and 3.

| Treatment                                   | CAIR | CAIR<br>minus<br>CpG | CAIR<br>minus<br>$\alpha$ CD40 | CAIR<br>minus<br>$\alpha$ CTLA4 | CAIR<br>minus<br>RT | CAIR<br>minus<br>IC | CAIR<br>minus<br>CpG/ $\alpha$ CTLA4 | CAIR<br>minus<br>$\alpha$ CD40/ $\alpha$ CTLA4 | CAIR<br>minus<br>CpG/ $\alpha$ CD40 |
|---------------------------------------------|------|----------------------|--------------------------------|---------------------------------|---------------------|---------------------|--------------------------------------|------------------------------------------------|-------------------------------------|
| RT                                          | ***  | ***                  | ***                            | **                              | ns                  | ns                  | ns                                   | ns                                             | ns                                  |
| CAIR                                        |      | ns                   | ns                             | ns                              | *                   | **                  | ns                                   | *                                              | ns                                  |
| CAIR minus<br>CpG                           |      |                      | ns                             | ns                              | *                   | **                  | ns                                   | *                                              | ns                                  |
| CAIR minus<br>$\alpha$ CD40                 |      |                      |                                | ns                              | *                   | **                  | ns                                   | *                                              | ns                                  |
| CAIR minus<br>$\alpha$ CTLA4                |      |                      |                                |                                 | *                   | **                  | ns                                   | *                                              | ns                                  |
| CAIR minus RT                               |      |                      |                                |                                 |                     | ns                  | ns                                   | ns                                             | ns                                  |
| CAIR minus IC                               |      |                      |                                |                                 |                     |                     | ns                                   | ns                                             | ns                                  |
| CAIR minus<br>CpG/ $\alpha$ CTLA4           |      |                      |                                |                                 |                     |                     |                                      | ns                                             | ns                                  |
| CAIR minus<br>$\alpha$ CD40/ $\alpha$ CTLA4 |      |                      |                                |                                 |                     |                     |                                      |                                                | ns                                  |

ns = not significant; \* $p < 0.05$ ; \*\* $p < 0.01$ ; \*\*\* $p < 0.001$

**Weight of mice during treatments with anti-CD40**

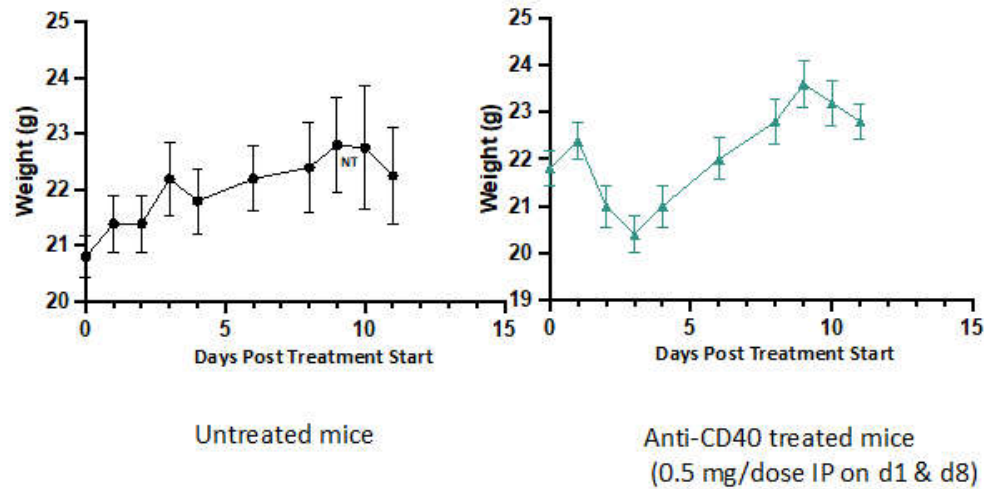

**Supplemental Figure S1:** C56BL/6 mice bearing 17 mm<sup>3</sup> 9464D-GD2 tumors were not treated, or received anti-CD40 (0.5 mg/mouse intraperitoneally) on days 1 and 8. Mouse weights were obtained every 2–3 days. There were 5 mice per group. Mouse weight dropped ~10% over 4 days following the first dose, with minimal weight loss after the 2nd dose.
